# Supplementary material for: Influence of biological sex and exercise on murine cardiac metabolism
Source: PubMed Central journal article supplement — J Sport Health Sci. 2022 Jun 7;11(4):479–94. doi: 10.1016/j.jshs.2022.06.001 (PMC9338340; doi:10.1016/j.jshs.2022.06.001), 2022-06-07
Supplement: mmc1.pdf [file mmc1.pdf]

# Influence of biological sex and exercise on murine cardiac metabolism

Kyle Fulghum<sup>a,b</sup>, Helen E Collins<sup>a</sup>, Steven P. Jones<sup>a</sup>, and Bradford G. Hill<sup>a,\*</sup>

## Affiliations:

<sup>a</sup> Diabetes and Obesity Center, Department of Medicine, Division of Environmental Medicine, Christina Lee Brown Envirome Institute, University of Louisville, Louisville, KY 40202, USA

<sup>b</sup> Department of Physiology, University of Louisville, Louisville, KY 40202, USA

**Running title:** Cardiac metabolism following exercise

**\*Corresponding author**

E-mail: [bradford.hill@louisville.edu](mailto:bradford.hill@louisville.edu)

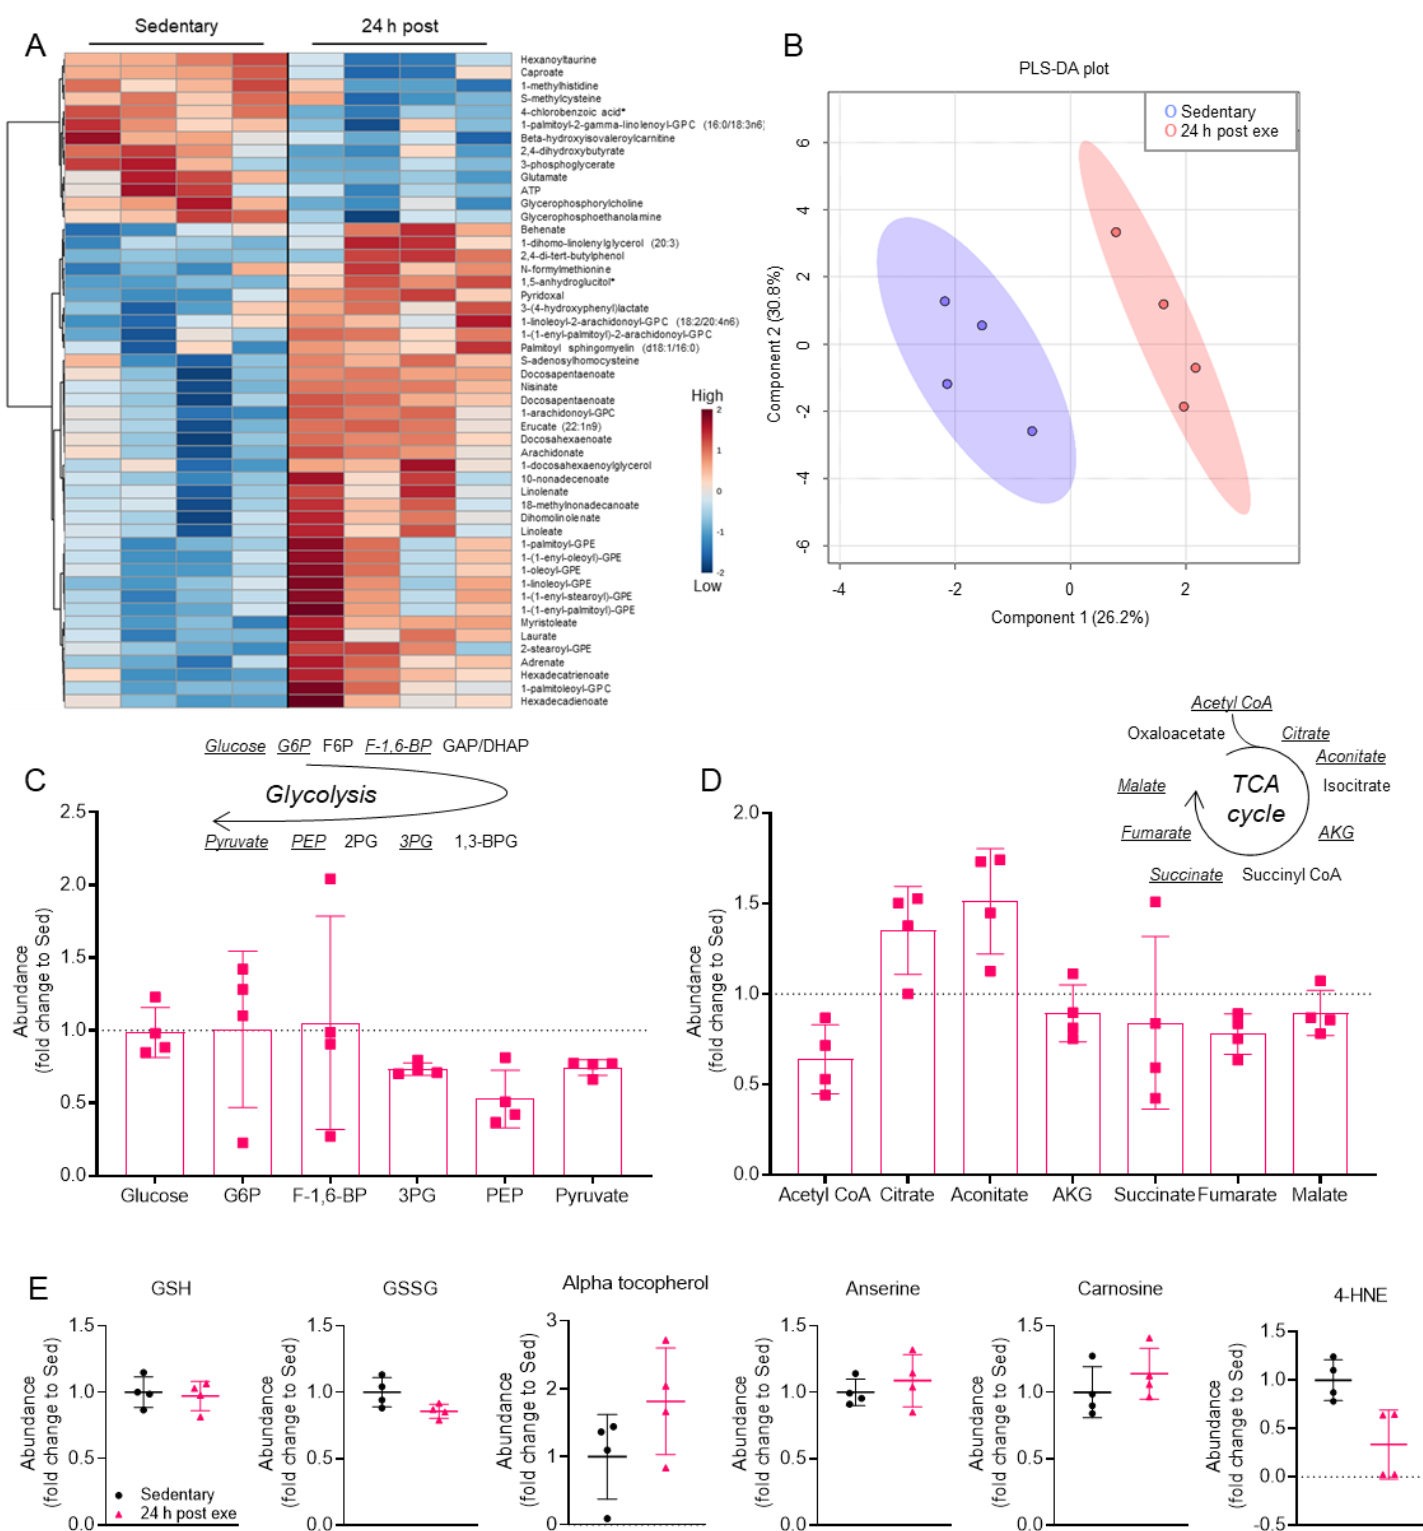

Supplemental Fig.1. Changes in the murine cardiac metabolome in female mice 24 h following exercise. Female mice were subjected to one bout of high-intensity exercise and hearts were freeze-clamped 24 h after the exercise bout for unbiased metabolomic analyses: (A) heatmap of the top 50 most changed metabolites in hearts from exercised versus sedentary female mice; bolded metabolites indicate FDR < 0.10 following one-way ANOVA;

(B) PLS-DA plot; relative abundances of (C) glycolytic and (D) TCA cycle intermediates shown as fold change relative to sedentary mice; and € abundances of antioxidants and oxidation products. *n* = 4 female mice per group. 1,3-BPG = 1,3-bisphosphoglycerate; 3PG = 3-phosphoglycerate; 4-HNE = 4-hydroxynonenal; AKG =  $\alpha$ -ketoglutarate; ANOVA = analysis of variance; FDR = false discovery rate; G6P = glucose 6-phosphate; GSH = reduced glutathione; GSSG = oxidized glutathione; PEP = phosphoenolpyruvate; PLS-DA = partial least-squares discriminant analysis; TCA = tricarboxylic acid;

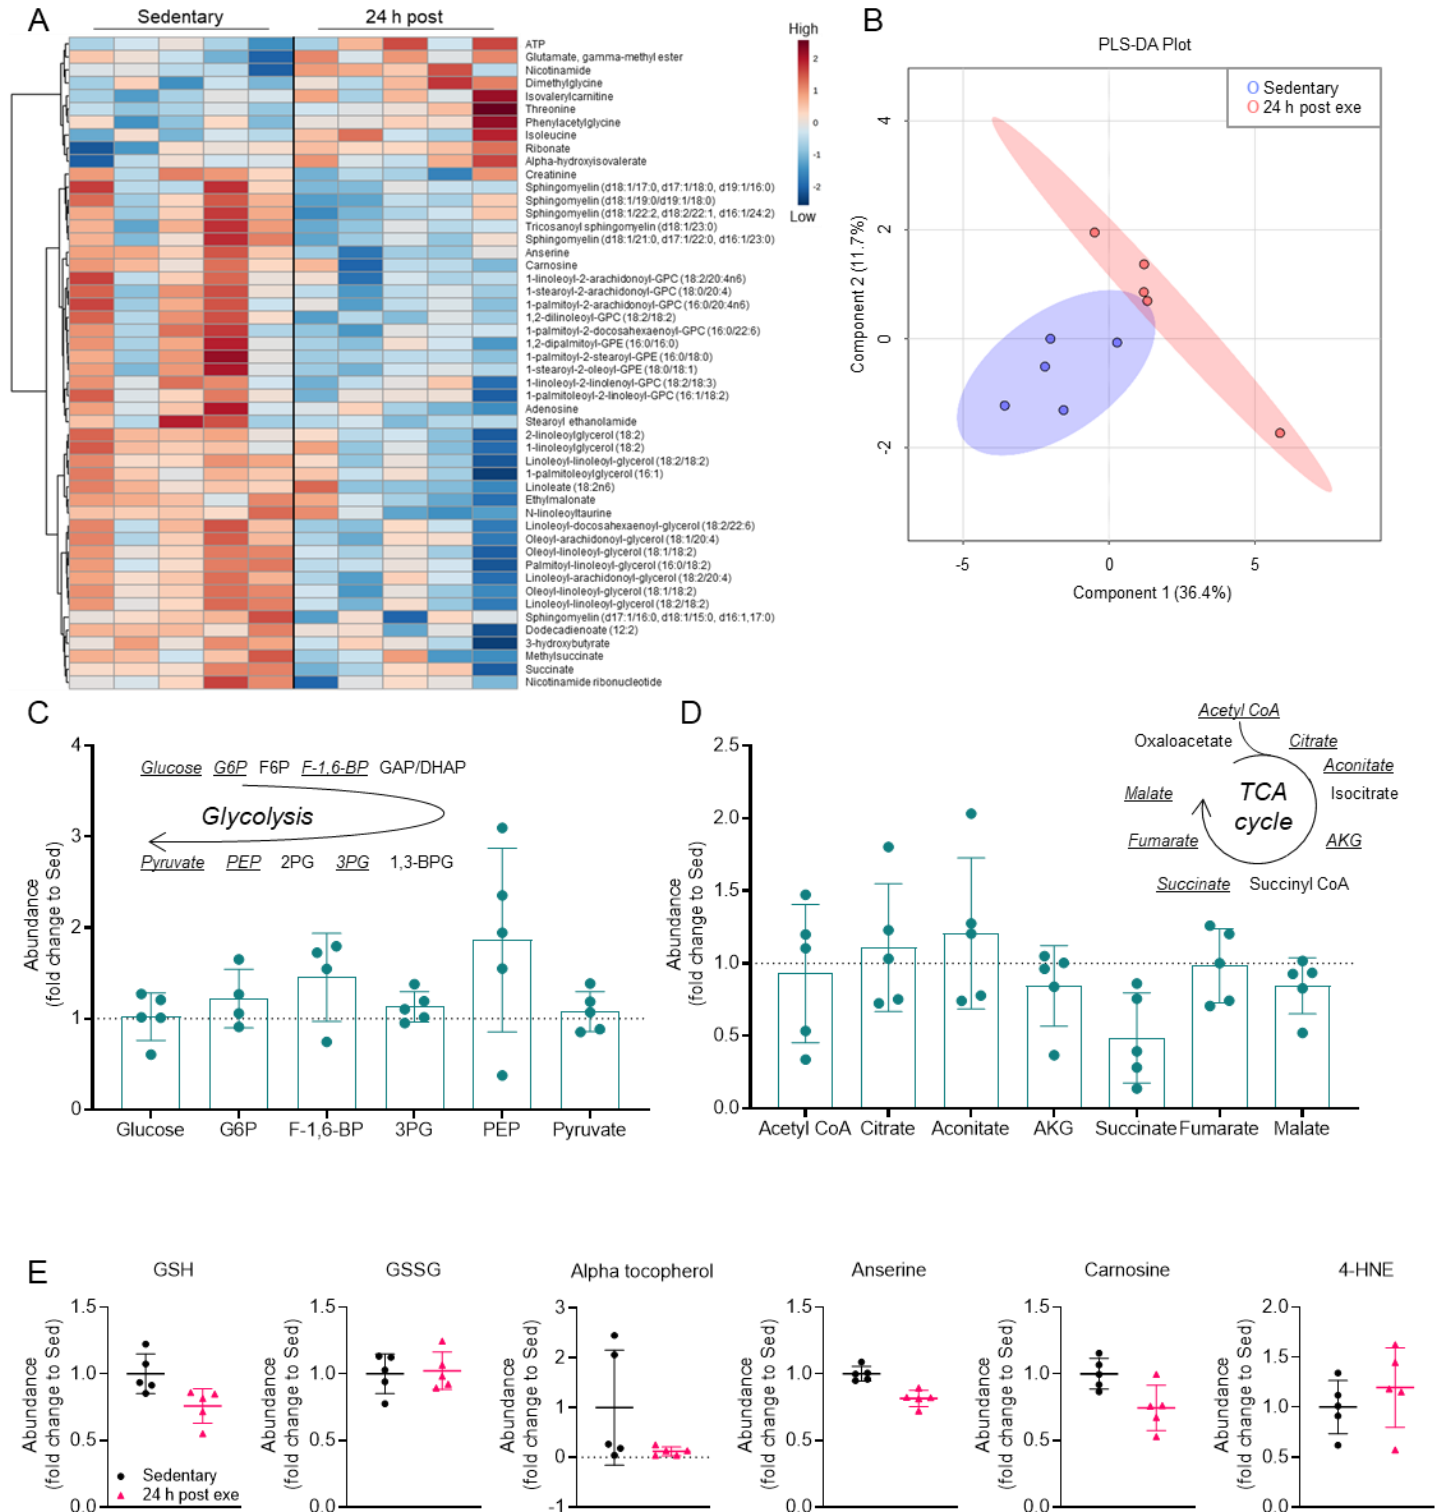

Supplemental Fig. 2. Changes in the murine cardiac metabolome in male mice 24 h following exercise. Male mice were subjected to one bout of high-intensity exercise and hearts were freeze-clamped 24 h after the exercise bout for unbiased metabolomic analyses: (A) heatmap of the top 50 most changed metabolites in hearts from exercised versus sedentary male mice; (B) PLS-DA plot; relative abundances of (C) glycolytic and (D) TCA cycle intermediates shown as fold change relative to sedentary mice; and (E) abundances of antioxidants and oxidation

products.  $n = 5$  male mice per group. 1,3-BPG = 1,3-bisphosphoglycerate; 3PG = 3-phosphoglycerate; 4-HNE = 4-hydroxynonenal; G6P = glucose 6-phosphate; AKG =  $\alpha$ -ketoglutarate; GSH = reduced glutathione; GSSG = oxidized glutathione; PEP = phosphoenolpyruvate; PLS-DA = partial least-squares discriminant analysis; TCA = tricarboxylic acid.
